# Supplementary material for: Complementary Feeding: Recommendations for the Introduction of Allergenic Foods and Gluten in the Preterm Infant
Source: MDPI journal article supplement (doi:10.3390/nu13072477), 2021-07-20
Supplement: s1 [file s1]

**Table S2.** Summary of available evidence and our suggestion for introduction of allergenic foods and gluten in CF of preterm infants.

| <b>What do we know from papers in preterm infants</b>                                                                                                                   | <b>What we know from papers not in preterm infants</b>                                                                                                                                                                                                                                        | <b>What we add to current guidelines</b>                                                                                                                            |
|-------------------------------------------------------------------------------------------------------------------------------------------------------------------------|-----------------------------------------------------------------------------------------------------------------------------------------------------------------------------------------------------------------------------------------------------------------------------------------------|---------------------------------------------------------------------------------------------------------------------------------------------------------------------|
| CF between the ages of 5-8 months chronological age in infants aged 3 months corrected age, if the required developmental skills are present ( <i>strong evidence</i> ) | Introduce food allergens in an age-appropriate form from 4 to 6 months of life, irrespective of infant's relative risk of developing allergy. Screening before introduction is not required ( <i>strong evidence</i> )                                                                        | "Highly allergenic" foods and gluten should be introduced during CF, after 4 months of corrected age, irrespective of infants' relative risk of developing allergy. |
| No increased risk of food allergy due only to preterm birth ( <i>low evidence</i> )                                                                                     | Absence of effective prevention strategies for CD. Gluten may be introduced into the infant's diet anytime between 4 and 12 months of age ( <i>strong evidence</i> )                                                                                                                          | Large amount of gluten are to be avoided soon after its introduction and during infancy, despite limited evidence to support this recommendation                    |
| No guidelines on introduction of food allergens and gluten in preterm infants.                                                                                          | Large amount of gluten are to be avoided soon after its introduction and during infancy, despite limited evidence to support this recommendation ( <i>low evidence</i> ). However, early consumption of high-dose gluten should be considered as a strategy to prevent CD in future research. |                                                                                                                                                                     |
